# Supplementary material for: A Critical Quantity for Noise Attenuation in Feedback Systems
Source: PLOS journal article supplement (doi:10.1371/journal.pcbi.1000764), 2010-04-29
Supplement: S2 (10.1371/journal.pcbi.1000764.s002) [file journal.pcbi.1000764.s002]

**Figure S1**

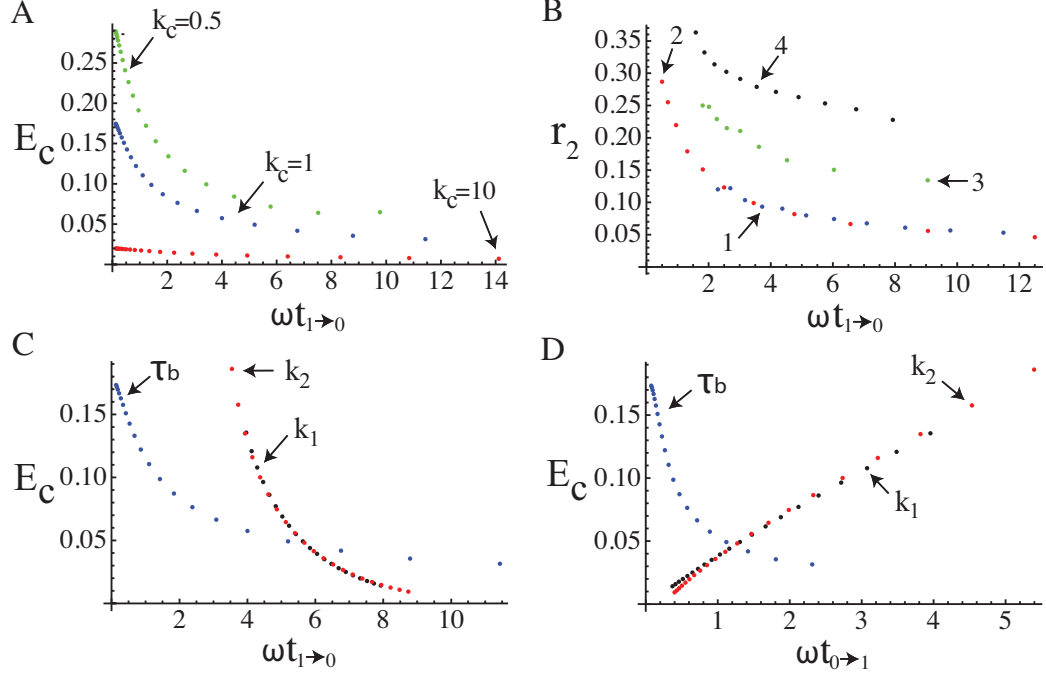

**Figure S1: Noise amplification rate in single-positive-loop systems with respect to  $t_{1 \rightarrow 0}$  and  $t_{0 \rightarrow 1}$ , respectively.** (A)  $E_c$  versus  $\omega t_{1 \rightarrow 0}$  for  $k_c = 0.5, 1, 10$ . Each dotted curve consists of 21 simulations with  $(\tau_b)_n = 0.005e^{\Delta\tau_b n}$  and  $\Delta\tau_b = -\ln(0.005)/20$ . (B)  $r_2$  versus  $\omega t_{1 \rightarrow 0}$ . Each point represents an average of  $r_2$  based on 100 simulations with different noisy signals but fixed  $\omega$ . Set 1 (blue):  $\tau_b = 0.01$ ,  $k_1 = 3$ ,  $k_2 = 0.3$ . Set 2 (red):  $\tau_b = 0.1$ ,  $k_1 = 3$ ,  $k_2 = 0.3$ . Set 3 (green):  $\tau_b = 0.01$ ,  $k_1 = 3$ ,  $k_2 = 0.6$ . Set 4 (black):  $\tau_b = 0.01$ ,  $k_1 = 1$ ,  $k_2 = 0.3$ . In set 2,  $\omega$  takes  $(1/\omega)_m = 2e^{\Delta d m}$ ,  $\Delta d = \ln(50/2)/10$ . For the rest,  $(1/\omega)_m = 20e^{\Delta d m}$ ,  $\Delta d = \ln(100/20)/10$ . (C-D)  $E_c$  versus  $\omega t_{1 \rightarrow 0}$  (C) or  $\omega t_{0 \rightarrow 1}$  (D).  $\tau_b$  curve (blue):  $(\tau_b)_n = 0.005e^{\Delta\tau_b n}$ ,  $\Delta\tau_b = -\ln(0.005)/20$ ;  $k_2$  curve (red):  $(k_2)_n = 0.06e^{\Delta k_2 n}$ ,  $\Delta k_2 = \ln(1.2/0.06)/20$ ;  $k_1$  curve (black):  $(k_1)_n = e^{\Delta k_1 n}$ ,  $\Delta k_1 = \ln(10)/20$ . All simulations use the same parameters and inputs as their counterparts in Figure 3, unless otherwise specified.
