# Supplementary material for: A Critical Quantity for Noise Attenuation in Feedback Systems
Source: PLOS journal article supplement (doi:10.1371/journal.pcbi.1000764), 2010-04-29
Supplement: S5 (10.1371/journal.pcbi.1000764.s005) [file journal.pcbi.1000764.s005]

Figure S4

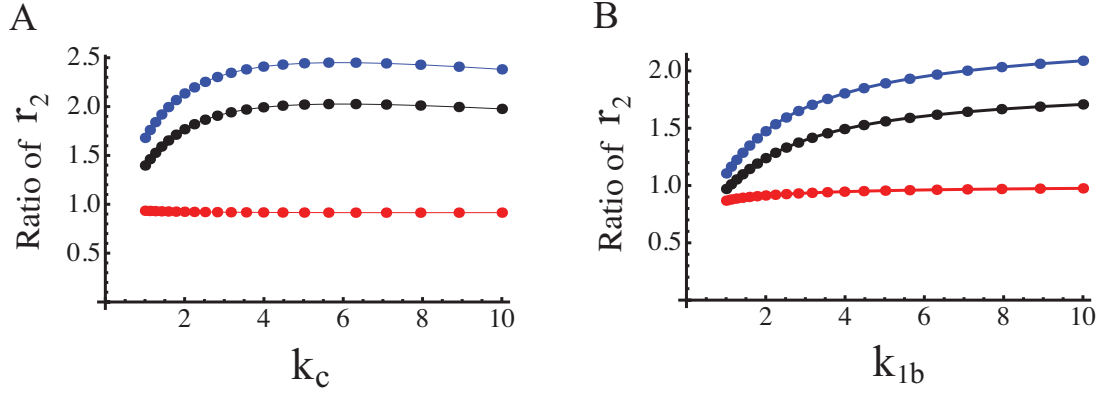

**Figure S4: The ratio of noise amplification rates in positive-negative-loop systems to single-positive-loop systems.** (A-B) Each dot represents the ratio of noise amplification rates in a positive-negative-loop system to the corresponding single-positive-loop system at a particular  $k_c$  (A) or  $k_{lb}$  (B) value. Red:  $\tau_a = 0.01$ ; black:  $\tau_a = 0.1$ , blue:  $\tau_a = 1$ . Other parameters are the same as in Figure 5.
