# Supplementary material for: A Critical Quantity for Noise Attenuation in Feedback Systems
Source: PLOS journal article supplement (doi:10.1371/journal.pcbi.1000764), 2010-04-29
Supplement: S8 (10.1371/journal.pcbi.1000764.s008) [file journal.pcbi.1000764.s008]

**Figure S7**

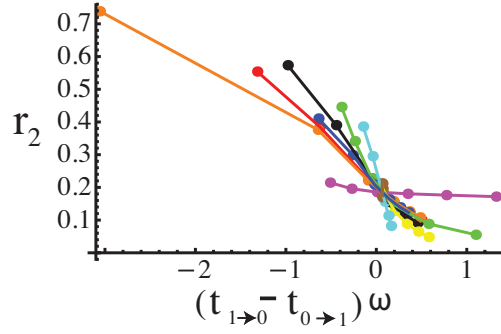

**Figure S7: The full plot of Figure 6G.** Ten parameters are varied systematically in  $\pm 3$ -fold ranges based on their original values given in (D). Each variation corresponds to one curve on the plot. The ten parameters are  $k_{42a}$  (red),  $k_{42d}$  (black),  $k_{24d}$  (pink),  $k_{24cm0}$  (magenta),  $k_{24cm1}$  (yellow),  $k_{24mc}$  (orange),  $k_{RL}$  (cyan),  $k_{RLm}$  (green),  $k_{B1cm}$  (blue),  $k_{Cla4a}$  (brown).
